# Supplementary material
Source: publisher figshare collection journal article supplement (https://gsapubs.figshare.com/articles/dataset/_/12174543)

**APPENDIX S1.** Images of sampled boulders from the investigated fans of the Kullu, Chandra and Karzok valley study areas.

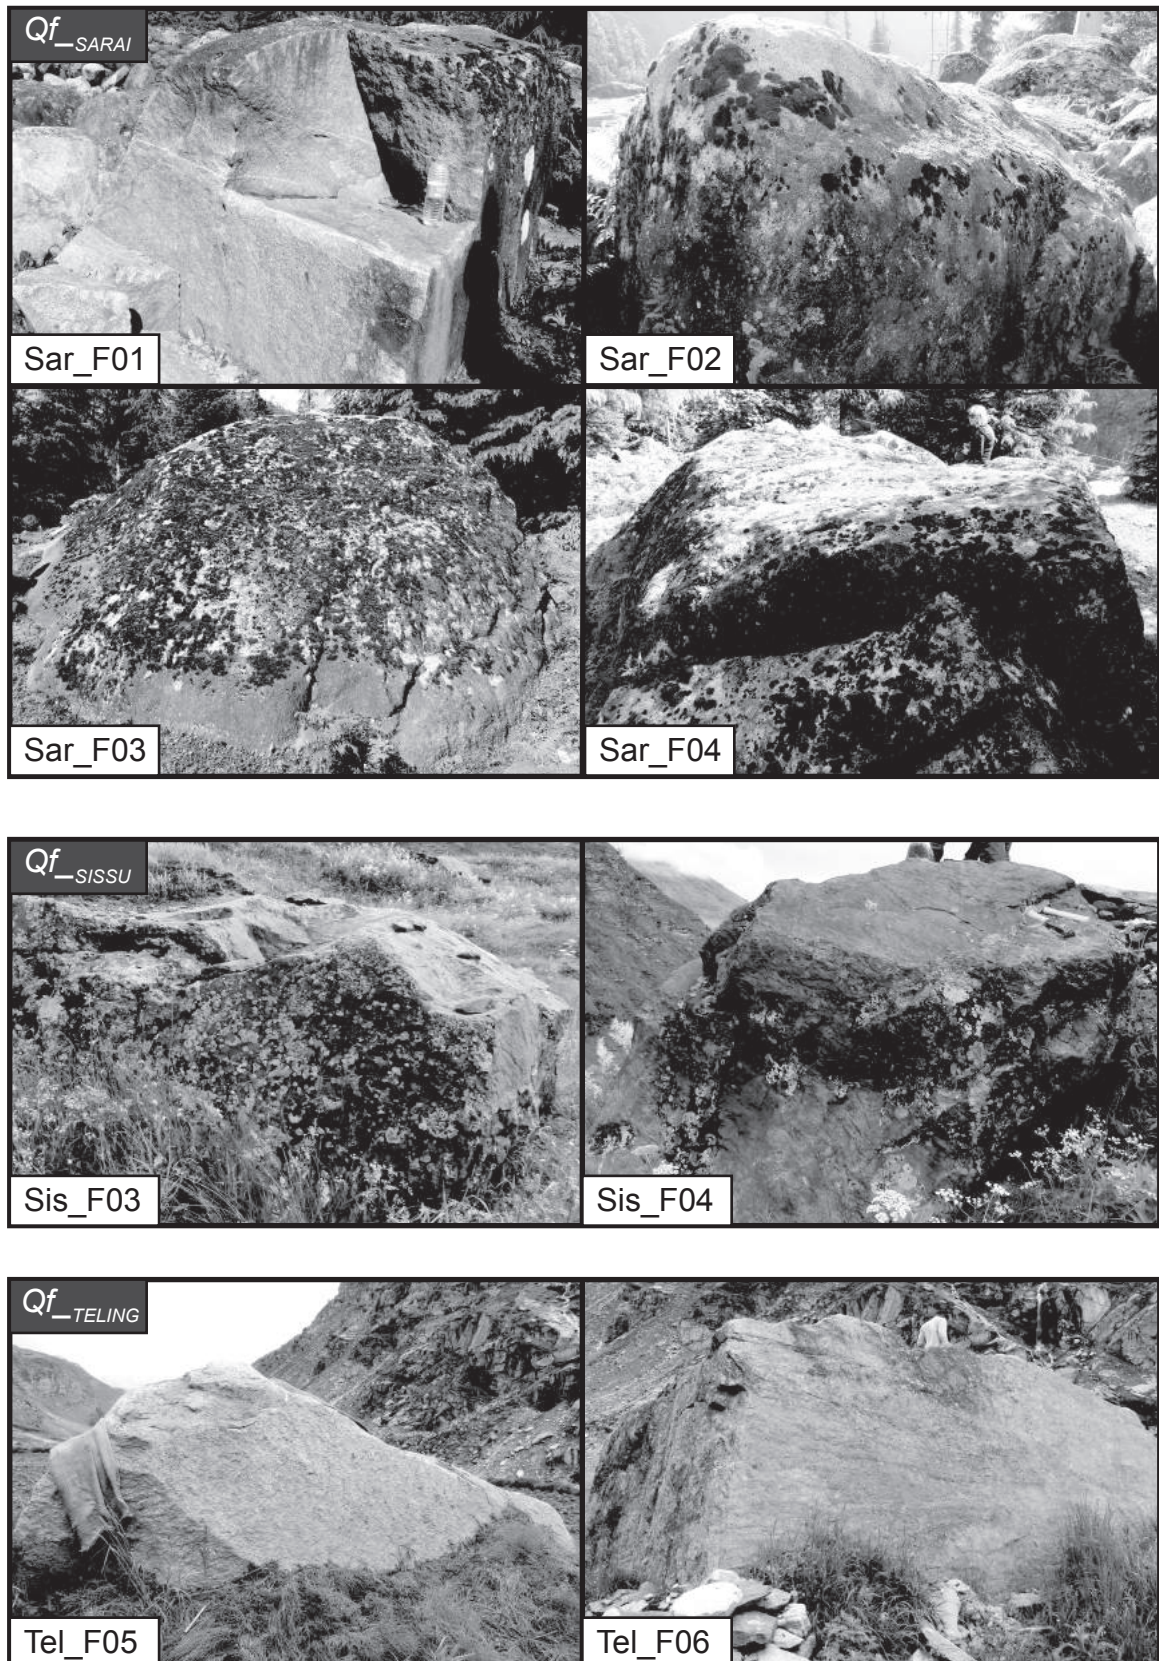



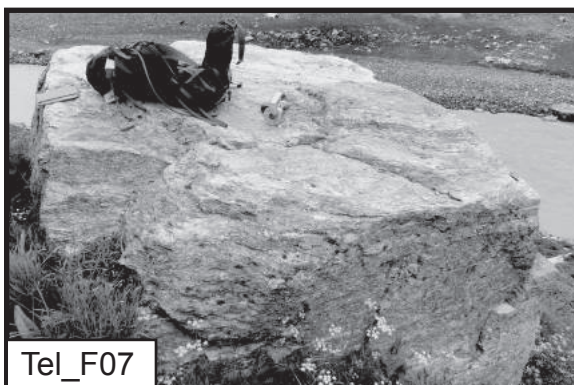

Tel\_F07

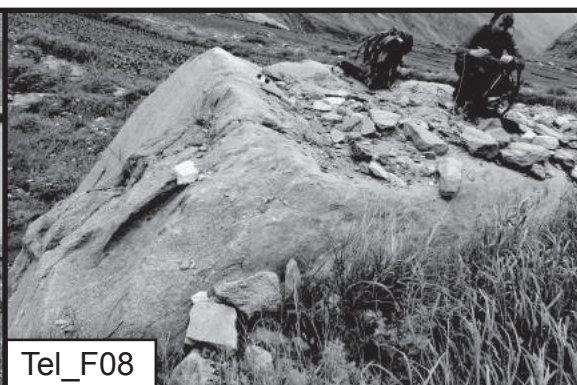

Tel\_F08

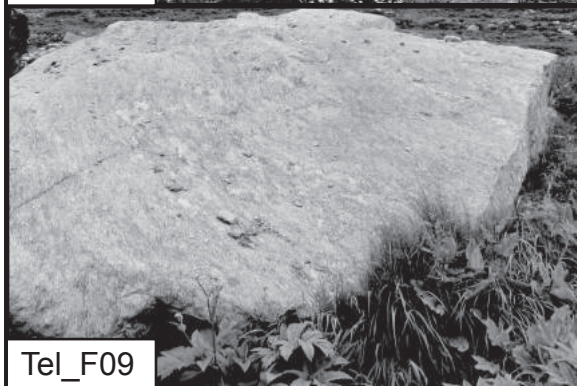

Tel\_F09

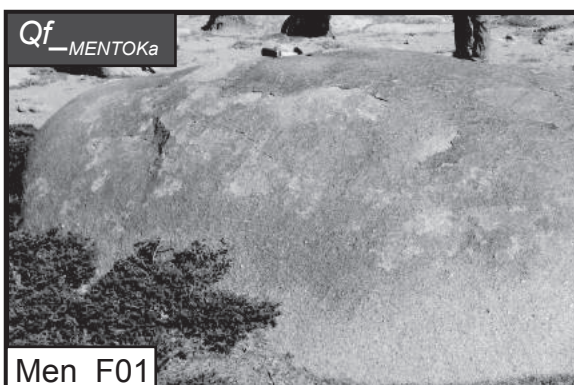

Men\_F01

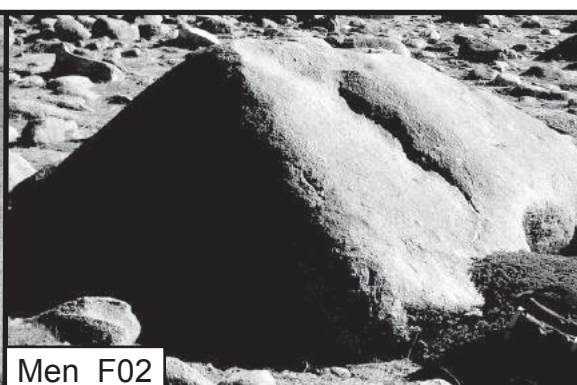

Men\_F02

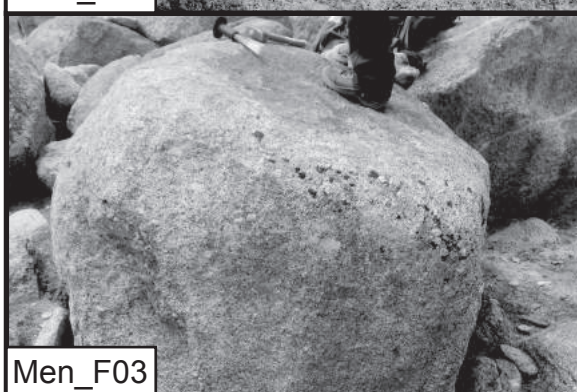

Men\_F03

Qf\_MENTOKa

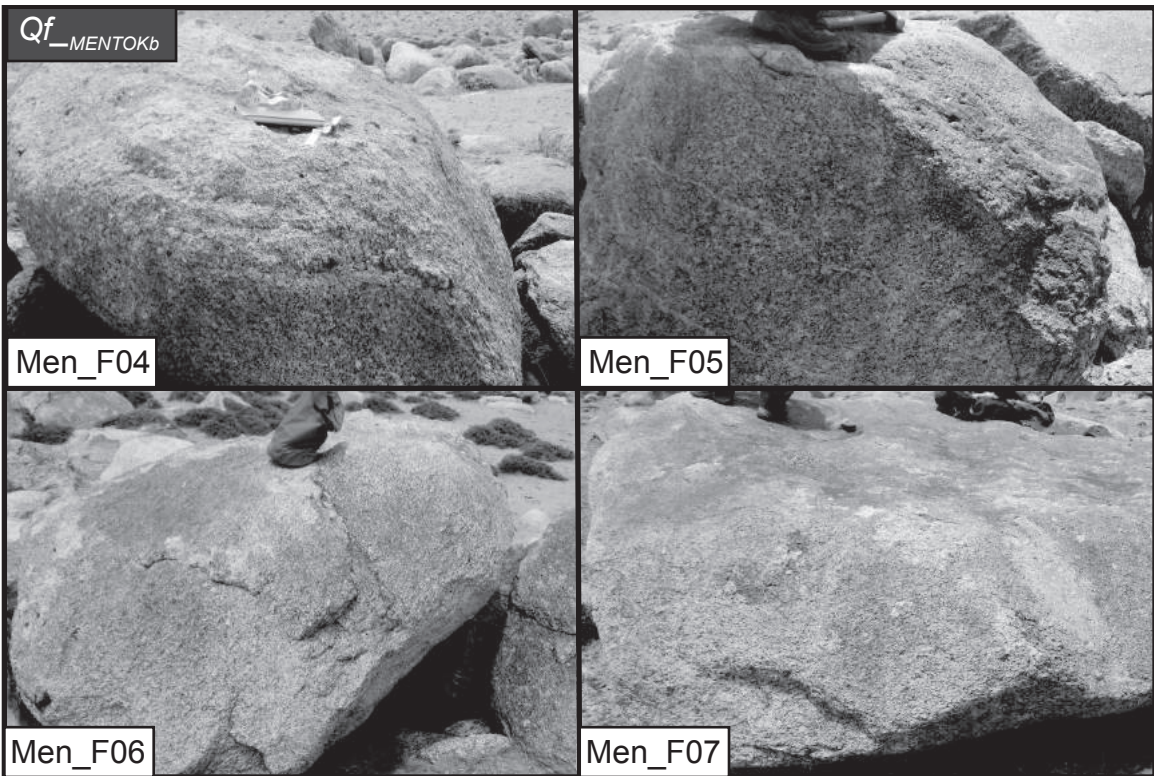

Supplement: Supplementary file 1 [file 1]
